# Supplementary material
Source: ML conference proceedings conference paper supplement (https://proceedings.mlr.press/v216/kang23a.html)
Supplement: Supplementary file 1 [file kang23a-supp.pdf]

---

# Heavy-tailed Linear Bandit with Huber Regression (Supplementary Material)

---

Minhyun Kang<sup>1</sup>

Gi-Soo Kim<sup>1,2</sup>

<sup>1</sup> Artificial Intelligence Graduate School, UNIST, Ulsan, Republic of Korea

<sup>2</sup> Department of Industrial Engineering, UNIST, Ulsan, Republic of Korea

We present the detailed proof of the result here. For some lemmas we follow the lines of Bastani and Bayati [2020] which prove an analogous bound for the Lasso estimator. For some calculation difference, we present them as well. We indicate it in the corresponding lemmas.

*Proof of Lemma 1.* Using  $\mathbb{E}[XX^T \mathbf{1}_{(X \notin U)}]$  is semi-positive definite,

$$\begin{aligned} \mathbb{E}[XX^T | X \in U] &= \mathbb{E}[XX^T \mathbf{1}_{(X \in U)}] \cdot \frac{1}{\mathbb{P}(x \in U)} \\ &\preceq \mathbb{E}[XX^T \mathbf{1}_{(X \in U)}] \cdot \frac{1}{p} \\ &\preceq \mathbb{E}[XX^T \mathbf{1}_{(X \in U)}] \cdot \frac{1}{p} + \mathbb{E}[XX^T \mathbf{1}_{(X \notin U)}] \cdot \frac{1}{p} \\ &= \mathbb{E}[XX^T] \cdot \frac{1}{p}. \end{aligned}$$

□

The following Lemma A states that the size of the set  $T_{i,t}$  is  $O(\log T)$ .

**Lemma A** (Lemma EC.8 of Bastani and Bayati [2020]). *When  $t \geq (Kq)^2$ ,  $Kq \geq 4$ ,*

$$\frac{1}{2}q \log t < |T_{i,t}| < 2q \log t.$$

*Proof of Lemma A.* We follow the lines of Lemma EC.8 of Bastani and Bayati [2020]. Let  $N_t$  be the largest integer with  $t > 2^{N_t+1}Kq$ . Then  $t \leq 2^{N_t+2}Kq$  and

$$(N_t + 2)q \leq |T_{i,t}| \leq (N_t + 3)q.$$

For the lower bound, we have

$$\frac{\log(t/Kq)}{\log 2} < N_t + 2.$$

Hence,

$$|T_{i,t}| \geq q \frac{\log(t/Kq)}{\log 2} \geq q \log(t/\sqrt{t}) = \frac{1}{2}q \log t.$$

The second inequality follows from  $t > (Kq)^2$ . For the upper bound, using  $N_t + 1 \leq \frac{\log(t/Kq)}{\log 2}$ ,

$$\begin{aligned} |T_{i,t}| &\leq \left( \frac{\log(t/Kq)}{\log 2} + 2 \right) q \\ &= \left( \frac{\log(t/Kq) + \log 4}{\log 2} \right) q \\ &= \left( \frac{\log(4t/Kq)}{\log 2} \right) q \\ &\leq 2q \log t. \end{aligned}$$

The last inequality follows from  $Kq \geq 4$ . □

*Proof of Lemma 4.* We follow the lines of Proposition 2 of Bastani and Bayati [2020]. By the Theorem 2, we have

$$\mathbb{P} \left( \lambda_{\min} \left( \hat{\Sigma}(T_{i,t}) \right) \leq \frac{\gamma p}{2} \right) \leq d \exp \left( \frac{-|T_{i,t}| \gamma p}{8} \right).$$

The size of the set  $T_{i,t}$  is bounded by

$$|T_{i,t}| \geq \frac{1}{2} q \log t \geq \frac{8}{\gamma p} \log \left( \frac{t^2 d}{\alpha} \right),$$

provided that  $q \geq \frac{48}{\gamma t}$  and  $t \geq \frac{d}{\alpha}$ . Hence, with probability at least  $1 - \frac{\alpha}{t^2}$ ,

$$\lambda_{\min} \left( \hat{\Sigma}(T_{i,t}) \right) \geq \frac{\gamma p}{2}. \quad (1)$$

When  $q \geq \frac{192}{\gamma p} d^{1/2}$  and  $t > \frac{2d+1}{\alpha}$ ,  $|T_{i,t}| \geq 32 \lambda_{\min}^{-1} \left( \hat{\Sigma}(T_{i,t}) \right) d^{1/2} \log(t^2(2d+1)/\alpha)$ . Then, Theorem 1 can be directly applicable with  $\tau = \tau_0 (|T_{i,t}| / \log(t^2(2d+1)/\alpha))^{1/(1+\delta)}$ ,  $\tau_0 \geq \nu_\delta$ . Hence,

$$\mathbb{P} \left( \|\hat{\beta}(T_{i,t}) - \beta_i\|_2 \leq \left( \frac{\log(t^2(2d+1)/\alpha)}{|T_{i,t}|} \right)^{\delta/(1+\delta)} \cdot 4 \lambda_{\min}^{-1} \left( \hat{\Sigma}(T_{i,t}) \right) \tau_0 d^{1/2} \right) \geq 1 - \frac{\alpha}{t^2}.$$

Together with (1), when  $q \geq 6 \left( \frac{32 \tau_0 d^{1/2}}{h \gamma p} \right)^{(1+\delta)/\delta}$  and  $t \geq \frac{2d+1}{\alpha}$ , with probability at least  $1 - \frac{2\alpha}{t^2}$ ,

$$\|\hat{\beta}(T_{i,t}) - \beta_i\|_2 \leq \frac{h}{4}. \quad \square$$

*Proof of Lemma 7.* We follow the lines of Lemma EC.14 of Bastani and Bayati [2020]. We have

$$\mathbb{1}_{(r \in \mathcal{A}_{i,t})} = \mathbb{1}_{(A_{r-1})} \cdot \mathbb{1}_{(x_r \in U_i)} \cdot \mathbb{1}_{(r \notin \cup_{i \in [k]} T_{i,t})}.$$

For  $n = 0, 1, 2, \dots$ ,

$$r \in [(2^n - 1)Kq + 1, 2^n Kq]$$

are forced-sampling time steps and

$$r \in [2^n Kq + 1, (2^{n+1} - 1)Kq]$$

are not. Let  $N_t$  be the largest integer such that  $t > 2^{N_t+1} Kq$  as before. Define the intervals

$$V_{1,t} = [2^{N_t} Kq + 1, (2^{N_t+1} - 1)Kq], \quad V_{2,t} = [2^{N_t+1} Kq + 1, t \wedge (2^{N_t+2} - 1)Kq],$$

and the sum of random variables

$$\begin{aligned} M_{i,t} &:= \sum_{r \in V_{1,t}} \mathbb{1}_{(r \in \mathcal{A}_{i,t})} + \sum_{r \in V_{2,t}} \mathbb{1}_{(r \in \mathcal{A}_{i,t})} \\ &< \sum_{r=1}^t \mathbb{1}_{(r \in \mathcal{A}_{i,t})} \\ &= |\mathcal{A}_{i,t}|. \end{aligned}$$

Both intervals  $V_{1,t}$  and  $V_{2,t}$  are not containing the forced-sampling time steps and hence we do not update the forced-sample estimator within the intervals. Therefore, we can write

$$\begin{aligned} M_{i,t} &= \sum_{r \in V_{1,t}} \mathbb{1}_{(A_{2^{N_t}} Kq)} \cdot \mathbb{1}_{(x_r \in U_i)} + \sum_{r \in V_{2,t}} \mathbb{1}_{(A_{2^{N_t+1}} Kq)} \cdot \mathbb{1}_{(x_r \in U_i)} \\ &\geq \mathbb{1}_{(A_{2^{N_t}} Kq)} \cdot \mathbb{1}_{(A_{2^{N_t+1}} Kq)} \cdot \sum_{r \in V_{1,t} \cup V_{2,t}} \mathbb{1}_{(x_r \in U_i)}. \end{aligned}$$

The lower bound of cardinality of two disjoint intervals is

$$\begin{aligned} |V_{1,t} \cup V_{2,t}| &= (t \wedge 2^{N_t+2} - 1) Kq - 2^{N_t+1} Kq + (2^{N_t+1} Kq - Kq - 2^{N_t} Kq) \\ &= (t - 2^{N_t} Kq - Kq) \wedge (3 \cdot 2^{N_t} Kq - 2Kq) \\ &> \left(\frac{t}{2} - Kq\right) \wedge \left(\frac{3}{4}t - 2Kq\right) \\ &> \left(\frac{t}{2} - \frac{t}{80}\right) \wedge \left(\frac{3}{4}t - \frac{t}{40}\right) \\ &= \frac{39}{80}t. \end{aligned}$$

The first inequality follows from  $t \leq 2^{N_t+2} Kq$ . The last inequality follows from  $t > (Kq)^2$  and  $q > 80$ . The upper bound of the cardinality of two disjoint intervals is

$$\begin{aligned} |V_{1,t} \cup V_{2,t}| &< t - 2^{N_t} Kq - Kq \\ &< t - \frac{t}{4} - Kq \\ &< \frac{3}{4}t. \end{aligned}$$

The probability of two events is bounded by

$$\begin{aligned} \mathbb{P}(A_{2^{N_t} Kq} \text{ and } A_{2^{N_t+1} Kq}) &\geq 1 - \frac{2K\alpha}{(t/4)^2} - \frac{2K\alpha}{(t/2)^2} \\ &= 1 - \frac{32K\alpha}{t^2} \\ &> 1 - 0.01. \end{aligned}$$

The last inequality is from  $t^2 > (Kq)^4$  and  $\alpha \in (0, 1)$ . Hence, we have

$$\begin{aligned} \mathbb{E}[M_{i,t}] &\geq \mathbb{P}(A_{2^{N_t} Kq} \text{ and } A_{2^{N_t+1} Kq}) p |V_{1,t} \cup V_{2,t}| \\ &\geq 0.48tp. \end{aligned}$$

The Hoeffding's inequality implies,

$$\begin{aligned} \mathbb{P}(\mathbb{E}[M_{i,t}] - M_{i,t} \geq \eta^2) &\leq \exp\left(-\frac{2\eta}{|V_{1,t} \cup V_{2,t}|}\right) \\ &\leq \exp\left(-\frac{8\eta^2}{3t}\right). \end{aligned}$$

Let  $\eta = 0.23tp$ . Then

$$\begin{aligned} \mathbb{P}(M_{i,t} < 0.48tp - 0.23tp) &\leq \exp\left(-\frac{8}{3}t(0.23p)^2\right) \\ &\leq \exp(-tp^2/9). \end{aligned}$$

Since  $M_{i,t} \leq |\mathcal{A}_{i,t}|$ ,

$$\mathbb{P}\left(|\mathcal{A}_{i,t}| < \frac{tp}{4}\right) \leq \exp(-tp^2/9) \leq \frac{\alpha}{t^2},$$

provided that  $t \geq \frac{1}{\alpha}$  and  $q \geq \frac{54}{p}$ . □

We now provide the proof of the expected regret bound.

*Proof of Theorem 4.* Lemma EC.19 of Bastani and Bayati [2020] states that the upper bound of expected regret can be decomposed into

$$\begin{aligned} \sum_{t=1}^T \mathbb{E}[r_t] &= \sum_{t=1}^T \mathbb{E}[x^T \beta_{a^*(t)} - x^T \beta_{a(t)}] \\ &\leq 2 \sum_{i \in \mathcal{D}} \mathbb{P}(\|\hat{\beta}(S_{a^*(t), t-1}) - \beta_{a^*(t)}\|_2 > \Delta) + 2 \sum_{i \in \mathcal{D}} \mathbb{P}(\|\hat{\beta}(S_{a(t), t-1}) - \beta_{a(t)}\|_2 > \Delta) + 4\Delta^2 K C_0 \end{aligned}$$

for  $\Delta > 0$ . From Lemma 7 with  $\alpha = (2d + 1)t$ , we have

$$\mathbb{P}\left(\|\hat{\beta}(S_{i,t}) - \beta_i\|_2 \geq \left(\frac{4}{pt} \log t\right)^{\delta/(1+\delta)} \frac{32\tau_0 d^{1/2}}{\gamma p}\right) \leq \frac{3(2d+2)}{t}$$

for  $i \in K_{opt}$ . Let  $\Delta = \left(\frac{4}{pt} \log t\right)^{\delta/(1+\delta)} \frac{32\tau_0 d^{1/2}}{\gamma p}$  then,

$$\mathbb{E}[r_t] \leq \frac{12K(2d+1)}{t} + 4 \left(\frac{32\tau_0}{\gamma p}\right)^2 d \left(\frac{4}{pt} \log T\right)^{\frac{2\delta}{1+\delta}} K C_0.$$

The cumulative regret is bounded by

$$\sum_{t=1}^T \mathbb{E}[r_t] \leq 12K(2d+1)(\log T + 1) + 4^7 d \left(\frac{\tau_0}{\gamma}\right)^2 \frac{1}{p^3} K C_0 ((\log T)^2 + \log T)$$

when  $\delta = 1$  and

$$\sum_{t=1}^T \mathbb{E}[r_t] \leq 12K(2d+1)(\log T + 1) + 64^2 16^{\frac{\delta}{1+\delta}} d \left(\frac{\tau_0}{\gamma}\right)^2 \frac{1}{p^{\frac{2+4\delta}{1+\delta}}} K C_0 \left(\frac{1+\delta}{1-\delta}\right) T^{\frac{1-\delta}{1+\delta}} (\log T)^{\frac{2\delta}{1+\delta}}$$

when  $0 < \delta < 1$ .

□

## References

Hamsa Bastani and Mohsen Bayati. Online decision making with high-dimensional covariates. *Operations Research*, 68(1): 276–294, 2020.
